# Supplementary material for: Sulfonic group modified carbon nanotubes: the decorative strategy for enhancing the performance of lithium-sulfur batteries
Source: Royal Society of Chemistry journal article supplement (doi:10.1039/d4nj00927d), 2024-01-01
Supplement: d4nj00927d1.pdf [file d4nj00927d1.pdf]

## Electronic Supplementary Information

### **Sulfonic groups modified carbon nanotubes: the decorative strategy for enhancing the performance of lithium-sulfur batteries**

Chensong Yang, Yakun Tang,\* Yue Zhang, Xingyan Zeng, Mengyao Dai and Lang Liu\*

*State Key Laboratory of Chemistry and Utilization of Carbon Based Energy Resources;  
College of Chemistry, Xinjiang University, Urumqi, 830017, Xinjiang, PR China.*

\* Corresponding authors

E-mail: liulang@xju.edu.cn;

yktang1990@sina.com;

#### **Preparation of polymer nanotubes (PNTs)**

A solution of divinyl benzene (3 g) and vinylbenzyl chloride (1 g) in n-heptane (100 g) were added boron trifluoride diethyl etherate complex (100 mg) at room temperature. After reacting for 10 min by ultrasonic waves, a large quantity of precipitation was produced. Then the reaction was terminated by dropping ethanol. The white fibers were filtered and washed with ethanol. After drying in a vacuum oven, and the obtained polymer nanotubes were labeled as PNTs.

#### **Preparation of sulfonated polymer nanotubes (SPNTs)**

0.2 g of PNTs were immersed in 30 mL of concentrated sulfuric acid and stirred at 50°C for 12 h. The mixture was diluted by a large amount of deionized water, and the sample was collected by suction filtration and washed with water and ethanol. The obtained sulfonated polymer nanotubes were labeled as SPNTs.

### **Preparation of thin-walled porous carbon nanotubes (TCNTs)**

First, 200 mg SPNTs was added into 15 mL of ethanol and treated by ultrasound for 10 min. Second, 5 mL of ethanol and 10 mL of tetraethyl orthosilicate were added. After stirring for 8 h at room temperature, it is centrifugated. The residue was dispersed into 10 mL of ethanol, and ammonium hydroxide was added drop by drop to adjust the pH at 9 - 10. The mixture was stirred for 1 h, and 5 mL of water was instilled; the reaction continues for another 5 h. SPNT/SiO<sub>2</sub> was obtained through the centrifugation and drying at 80°C in air. Then, the obtained SPNT/SiO<sub>2</sub> was respectively calcined at 900°C (5°C min<sup>-1</sup>) in N<sub>2</sub> for 3 h, leading to the formation of the CNT/SiO<sub>2</sub> hybrid. To remove the SiO<sub>2</sub>, the calcinate was etched with hydrofluoric acid at 60°C, and the obtained thin-walled carbon nanotubes were labeled as TCNTs.

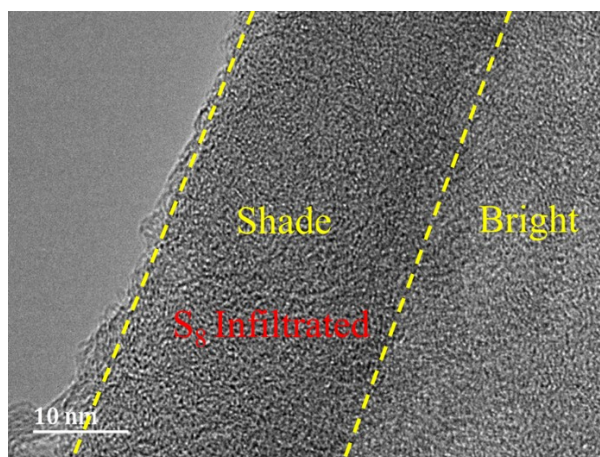

**Figure S1** HRTEM image of S-TCNTs/S.
